# Supplementary material for: Trends in Use of Seclusion and Restraint in Response to Injurious Assault in Psychiatric Units in U.S. Hospitals, 2007–2013
Source: Atypon-hosted journal article supplement (doi:10.1176/appi.ps.201400490), 2015-07-15

Appendix

Figure 1. Percentages of responses to assault involving seclusion and involving restraint

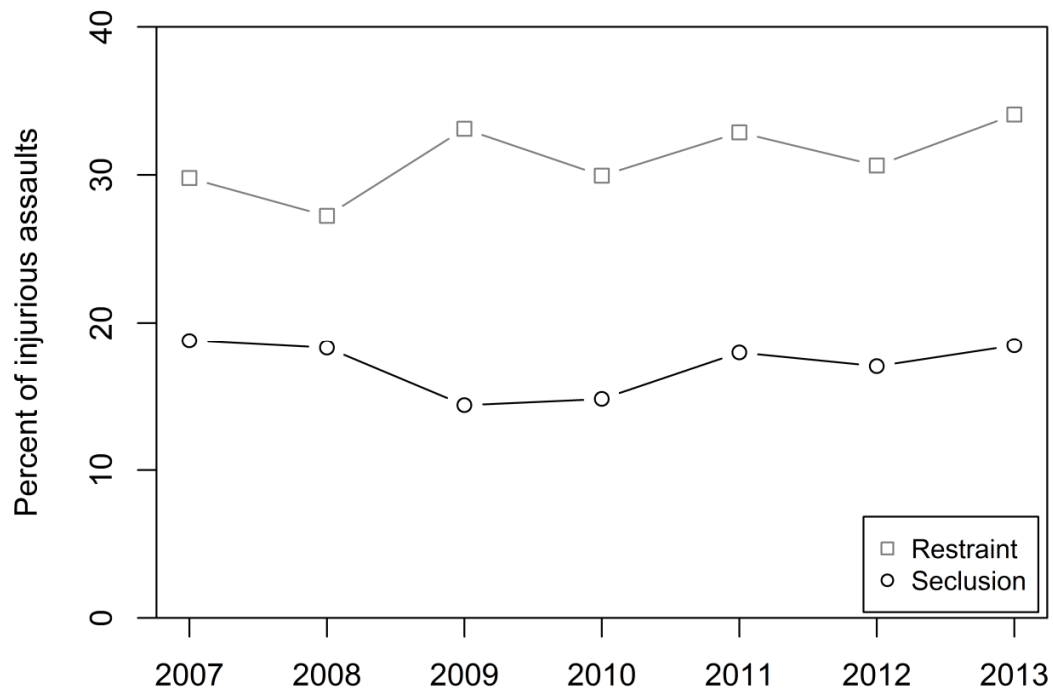

Figure 2. Average hours in seclusion and in physical restraint

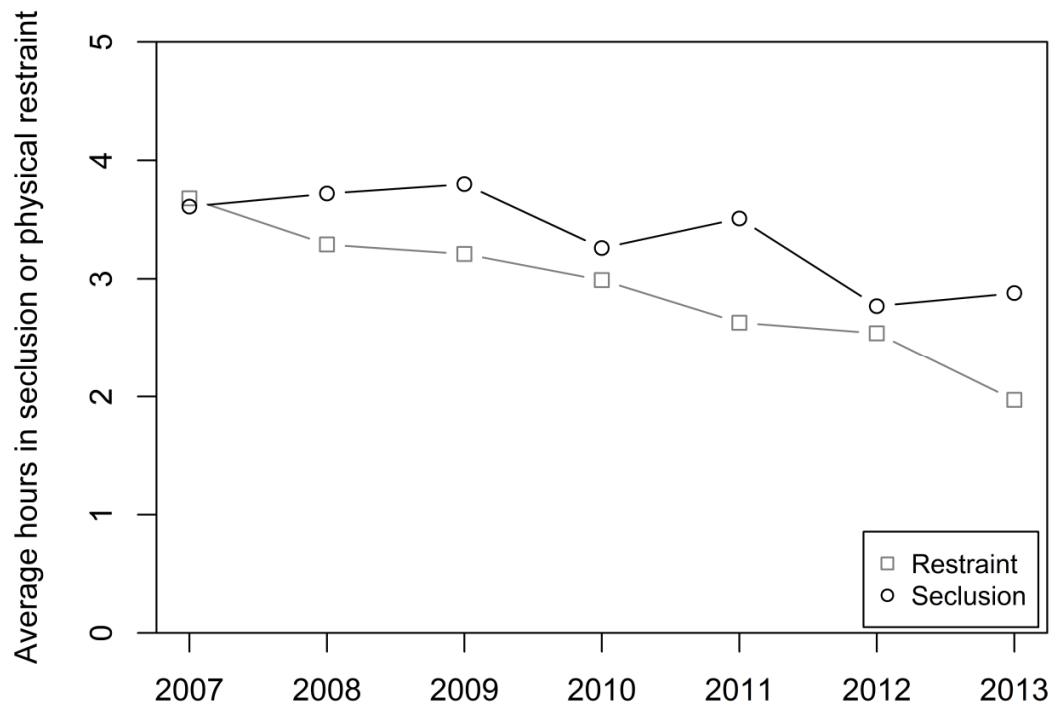

Figure 3. Percentages of restraints involving devices, medication, and holds

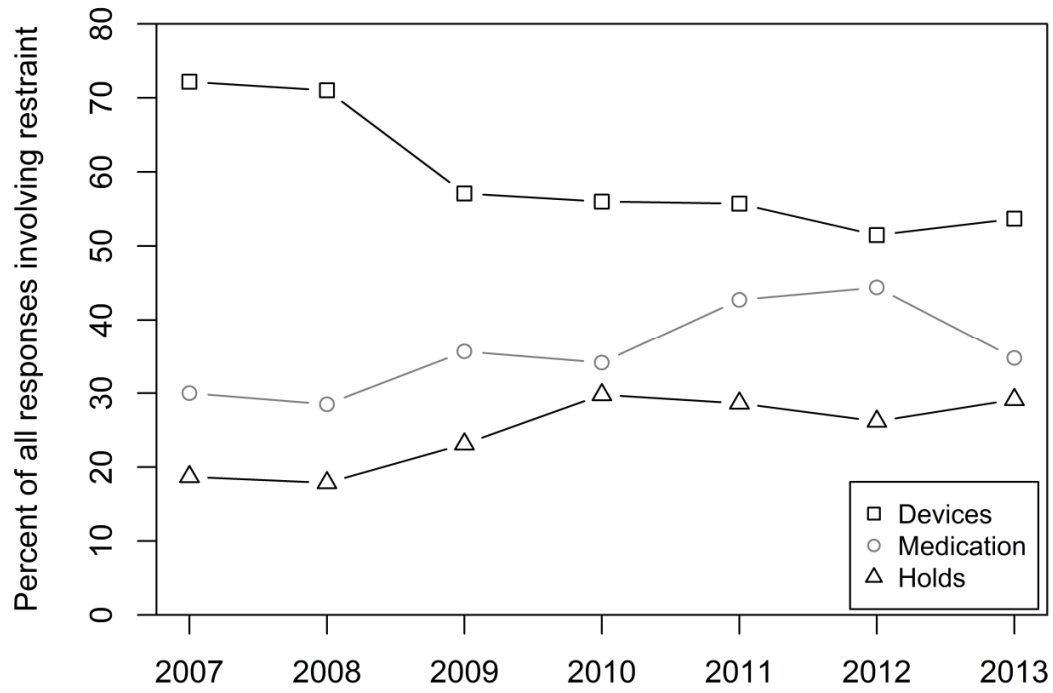

Supplement: appi.ps.201400490.ds001.pdf [file appi.ps.201400490.ds001.pdf]
